# Supplementary material for: Investigating the role of anthropogenic terpenoids in urban secondary pollution under summer conditions by a box modeling approach
Source: Royal Society of Chemistry journal article supplement (doi:10.1039/d4ea00112e), 2025-01-01
Supplement: d4ea00112e1.xlsx [file d4ea00112e1.xlsx]

## Sheet: Bias
			color code:	< 5th Percentile		Concentraions in ppb
				[5th - 25th Percentiles]
				[25th - 75th Percentiles]
				[75th - 95th Percentiles]
				> 75th Percentile
Oxidants	O3											NOx											NO											NO2											OH
		Observations								Simulation			Observations								Simulation		Observations									Modeled Concentration			Observations								Modeled Concentration			Observations
	Hour	Number of sampling	Mean	Standard deviation	5th Percentile	25th percentile	Median	75th percentile	95th percentile	Modeled concentration		Hour	Number of sampling	Mean	Standard deviation	5th Percentile	25th percentile	Median	75th percentile	95th percentile	Modeled concentration		Hour	Number of sampling	Mean	Standard deviation	5th Percentile	25th percentile	Median	75th percentile	95th percentile	Modeled concentration		Hour	Number of sampling	Mean	Standard deviation	5th Percentile	25th percentile	Median	75th percentile	95th percentile	Modeled concentration		Hour	Number of sampling	Mean	Standard deviation	5th Percentile
	0	360	22.8216	11.3343	4.5015	14.3063	24.785	29.2218	44.3574	13.6311		0	360	13.6428	10.7941	3.0095	6.5975	10.66	16.9	39.2805	9.55696		0	360	0.811972	1.3827	0.1	0.3	0.4	0.7	2.5495	0.117124		0	360	12.8309	9.83334	2.7	6.1575	10.235	16.3	36.73	9.43984		0	0
	1	360	22.398	10.2507	3.08115	16.3505	23.579	28.046	43.1982	12.3082		1	360	12.5397	10.612	2.63	6.055	10.48	13.075	41.235	9.72229		1	360	0.862722	1.72379	0.1	0.3	0.4	0.6	3.935	0.116114		1	360	11.677	9.27542	2.33	5.5975	10.13	12.7	33.805	9.60618		1	0
	2	360	21.024	10.7287	1.46205	15.9025	21.759	26.0942	43.1626	10.5874		2	360	13.2689	14.1039	2.7295	4.675	9.53	14.195	47.1345	8.94957		2	360	1.80522	5.26623	0.1	0.3	0.4	0.6	10.3525	0.148212		2	360	11.4637	9.92808	2.416	4.325	9.24	13.81	34.8015	8.80136		2	0
	3	360	17.9255	11.0169	1.044	11.755	19.4435	23.5843	35.4399	9.54407		3	360	17.3656	19.425	3.495	5.76	9.495	19.1025	58.1	9.36904		3	360	3.99197	10.4674	0.1	0.3	0.4	0.79	24.9495	0.179006		3	360	13.3736	10.3804	3.2	5.4525	8.99	18.7225	33.601	9.19004		3	0
	4	360	13.8956	9.81055	1.32605	4.31475	15.2545	19.8175	27.1979	8.12581		4	360	26.1169	26.0972	5.979	10.44	15.55	30.425	96.7395	9.98157		4	360	8.52072	17.7678	0.3	0.6	1.34	4.815	62.1285	0.313324		4	360	17.5962	10.2909	5.499	9.71	13.925	27.285	37.22	9.66825		4	0
	5	360	12.5225	7.61422	2.1956	7.064	12.1095	17.3365	24.1135	7.36657		5	360	33.9886	31.1074	6.336	15.4	22.95	35.87	101.048	13.2101		5	360	13.6288	23.2912	0.7	2.5125	4.7	9.6	62.62	3.63014		5	360	20.3597	9.94684	5.4755	13.605	17.245	28.1125	38.87	9.57999		5	8	337201	271918	114854
	6	360	14.8129	6.67692	3.8046	10.6068	14.8545	18.968	23.3393	6.91163		6	360	35.8416	35.1814	5.69	15.575	22.465	34.525	113.332	19.0321		6	360	16.05	25.5167	1.1	3.2825	6.16	11.045	73.6725	10.0466		6	360	19.4617	11.5016	4.699	11.715	16	25.9675	41.71	8.98543		6	66	642127	478157	43635.3
	7	359	18.74	7.38778	5.0874	14.5305	18.367	22.384	30.865	7.558		7	359	30.2487	29.8498	4.29	12.6	19.14	29.65	97.997	26.2338		7	359	12.9686	18.7645	0.6	3.505	6.35	10.11	57.06	16.5747		7	359	16.4618	12.4441	3.48	8.895	12.53	21.35	45.91	9.65913		7	94	1.08126e+06	696483	188596
	8	367	23.9796	6.38775	11.55	20.4945	23.623	27.3485	33.2225	9.41406		8	367	22.6358	17.3162	6.654	12.5	16.3	25.25	64.035	24		8	367	8.1726	7.05934	1.524	4.1	5.77	8.5	22.999	15.5394		8	367	14.249	10.8539	3.99	7.8	10.47	17.74	37.67	8.4606		8	96	1.95746e+06	1.04235e+06	360009
	9	372	28.9767	7.46168	19.6502	24.1898	27.15	32.6855	41.3793	12.0485		9	372	17.3475	11.6634	6.26	10.7275	13.68	20.005	45.106	18.2861		9	372	5.02946	3.3147	1.67	2.72	4	6.25	11.8405	11.4992		9	372	12.318	8.71479	4.3365	7.2375	9.465	13.815	32.025	6.78689		9	96	2.89057e+06	1.33948e+06	765961
	10	372	33.6962	11.275	20.4931	27.0903	30.64	36.697	62.6889	15.6584		10	372	13.6327	9.4859	5.8855	8.8	11.065	14.91	24.465	14.3691		10	372	3.55363	3.36026	1.5655	2.16	2.88	3.71	6.0105	8.45197		10	372	10.079	6.55254	4.4	6.16	8.52	10.97	20.5955	5.9171		10	96	3.72497e+06	1.37855e+06	1.41107e+06
	11	372	37.3183	13.4946	23.8542	29.8667	33.887	39.917	77.3894	19.0512		11	372	10.3949	3.69161	5.844	7.575	10.255	12.3025	15.7	10.5021		11	372	2.39358	0.957628	1.1955	1.77	2.255	2.84	3.9045	5.79248		11	372	8.00134	3.14996	4.31	5.5475	7.365	9.8525	13.62	4.70966		11	101	4.16187e+06	1.72388e+06	2.00559e+06
	12	372	38.9087	14.3283	21.72	31.178	35.581	41.7878	79.99	21.9385		12	372	10.4688	3.73973	5.6495	7.4	9.73	12.8	17.8315	7.73719		12	372	2.21457	0.833667	0.9955	1.6675	2.16	2.72	3.6	4.025		12	372	8.25422	3.36116	4.3495	5.61	7.45	10.2625	15.251	3.71219		12	102	3.61948e+06	1.19323e+06	2.00969e+06
	13	372	40.1505	14.7897	25.3466	30.977	35.9675	44.5045	83.2831	26.5609		13	372	10.6313	3.87965	5.69	7.2075	10.445	13.21	18.3765	6.85432		13	372	2.14925	1.23901	0.89	1.38	1.87	2.53	5.0855	3.20831		13	372	8.48204	3.19243	4.37	5.7375	8.24	10.63	13.919	3.64601		13	97	3.31793e+06	1.27402e+06	1.61685e+06
	14	372	41.2849	15.6482	25.7462	31.469	36.591	46.6535	86.6243	29.0726		14	372	10.5612	3.46692	5.6	7.6	10.43	13.1	16.3	6.13583		14	372	1.95064	0.962957	0.8855	1.29	1.69	2.35	3.8605	2.66285		14	372	8.6106	2.94639	4.3755	6.1875	8.455	11.01	13.4015	3.47298		14	90	2.73729e+06	969282	1.05758e+06
	15	372	40.988	15.7757	25.254	31.6385	35.928	47.704	84.1731	32.4442		15	372	11.8214	4.66886	6.394	8.2	11.21	14.6125	19.7595	6.30148		15	372	1.9375	1.40806	0.79	1.19	1.58	2.16	4.1	2.43588		15	372	9.8839	3.71262	5.252	6.9075	8.965	12.48	15.9385	3.86559		15	78	1.96081e+06	992916	802356
	16	372	40.3214	15.9478	24.5202	30.691	35.923	44.7632	81.3512	31.7651		16	372	12.992	4.38166	6.9255	9.1975	12.3	16.5	20.5	7.678		16	372	1.81073	0.973534	0.69	1.18	1.59	2.1625	3.7	2.71691		16	372	11.1812	3.95864	5.9055	7.715	10.325	13.945	18.4795	4.9611		16	69	1.3351e+06	558067	604669
	17	372	38.6581	15.0966	23.0524	28.716	34.351	42.4795	76.4706	31.3283		17	372	13.6134	4.28555	7.6	10.5	12.79	16.125	21.245	8.96608		17	372	1.4182	0.833776	0.5	0.9	1.2	1.68	3.1245	2.64343		17	372	12.1952	3.95512	6.801	9.3275	11.505	14.5325	20.1155	6.32265		17	47	815498	353019	377148
	18	372	35.9641	13.6099	20.2714	27.866	32.2065	40.2355	67.194	29.0549		18	372	14.4546	4.84765	8.991	11.375	13.585	16.1475	24.645	9.75451		18	372	1.08261	0.7203	0.3	0.6	0.9	1.39	2.4355	2.04813		18	372	13.372	4.63489	8.2055	10.3075	12.535	14.9075	23.6	7.70638		18	14	360478	164505	141050
	19	372	32.8479	13.3583	15.6738	25.2932	30.7075	36.4128	62.6595	26.7794		19	372	15.5744	5.74536	9.055	11.475	14.43	17.925	29.48	8.84073		19	372	0.622312	0.348918	0.2	0.4	0.59	0.8	1.28	0.831562		19	372	14.9521	5.66309	8.6	10.9	13.84	17.205	28.89	8.00917		19	4	471987	545943	165962
	20	372	30.0225	13.2709	10.7538	22.7125	29.175	33.7797	57.4691	24.223		20	372	16.0586	9.29044	7.7	10.73	13.725	17.6	35.611	9.25595		20	372	0.708656	1.23793	0.1	0.3	0.5	0.7	1.5845	0.156113		20	372	15.3499	8.42061	7.2	10.3075	13.285	17	34.434	9.09984		20	0
	21	372	27.4935	12.9839	5.2126	19.447	27.9495	32.7967	57.0867	18.9345		21	372	16.0343	10.8637	6.35	9.97	11.85	17.475	39.025	12.2906		21	372	0.960216	2.15593	0.1	0.3	0.4	0.6	3.5955	0.11163		21	372	15.0741	9.18518	6.105	9.52	11.4	16.55	35.204	12.179		21	2	47414.3	16835.3	36700.4
	22	360	26.3051	12.9408	3.6235	18.2797	27.1095	33.626	52.8269	17.5426		22	360	15.7283	13.1344	5.8855	7.8	11.2	16.325	42.56	11.1375		22	360	1.40764	4.10446	0.1	0.3	0.4	0.7	5.345	0.0593953		22	360	14.3206	9.94188	5.3995	7.575	10.705	15.75	38.5325	11.0781		22	0
	23	360	24.7378	12.051	2.00195	17.0538	27.422	31.3403	47.0776	14.9535		23	360	15.154	13.7245	4.295	6.98	10.485	15.525	40.439	9.37596		23	360	1.57661	4.42989	0.1	0.3	0.5	0.7	5.9605	0.0873611		23	360	13.5774	10.3269	3.9	6.41	10.045	15.075	35.8245	9.2886		23	0
Aromatics	Benzene											Toluene											Ethylbenzene											M+P-Xylenes											O-Xylene
		Observations								Simulation			Observations								Simulation			Observations								Simulation			Observations								Simulation			Observations
	Hour	Number of sampling	Mean	Standard deviation	5th percentile	25th percentile	Median	75th percentile	95th percentile	Modeled concentration		Hour	Number of sampling	Mean	Standard deviation	5th percentile	25th percentile	Median	75th percentile	95th percentile	Modeled concentration		Hour	Number of sampling	Mean	Standard deviation	5th percentile	25th percentile	Median	75th percentile	95th percentile	Modeled concentration		Hour	Number of sampling	Mean	Standard deviation	5th percentile	25th percentile	Median	75th percentile	95th percentile	Modeled concentration		Hour	Number of sampling	Mean	Standard deviation	5th percentile
	0	26	0.0693846	0.0598372	0.011	0.011	0.063	0.083	0.16125	0.035404		0	26	0.798962	0.507489	0.226	0.61725	0.7775	0.941	1.90025	0.402729		0	26	0.112885	0.0831068	0.011	0.078	0.1115	0.13775	0.283	0.0310208		0	26	0.475731	0.31585	0.10175	0.36125	0.4285	0.54525	1.09925	0.147326		0	26	0.128423	0.105249	0.011
	1	26	0.0580385	0.0539781	0.011	0.011	0.0555	0.0835	0.167	0.0354961		1	26	0.759577	0.424638	0.203	0.55525	0.7415	0.917	1.5235	0.40475		1	26	0.108462	0.093411	0.011	0.0675	0.086	0.1325	0.23475	0.0311965		1	26	0.466923	0.34946	0.08925	0.29675	0.429	0.547	0.9345	0.148827		1	26	0.128231	0.117173	0.011
	2	26	0.0455769	0.0394605	0.011	0.011	0.033	0.07275	0.114	0.0323247		2	26	0.714115	0.446814	0.1995	0.31525	0.55	1.15275	1.40325	0.369276		2	26	0.0936923	0.0846852	0.011	0.011	0.0725	0.13575	0.22575	0.0284764		2	26	0.397962	0.300674	0.07975	0.176	0.306	0.55175	0.94	0.136326		2	26	0.0939231	0.10106	0.011
	3	26	0.0478846	0.048562	0.011	0.011	0.011	0.0815	0.12675	0.0335515		3	26	0.740615	0.569098	0.21175	0.29675	0.4445	1.1365	1.8305	0.383878		3	26	0.0889231	0.0986119	0.011	0.011	0.0555	0.13675	0.274	0.0296145		3	26	0.395885	0.373758	0.07625	0.1515	0.22	0.54725	1.1565	0.142182		3	26	0.0985769	0.123972	0.011
	4	26	0.0604231	0.0671656	0.011	0.011	0.011	0.1115	0.18325	0.0354851		4	26	0.8945	0.775403	0.21475	0.296	0.5405	1.26075	2.38675	0.406479		4	26	0.0963846	0.098745	0.011	0.011	0.0645	0.1765	0.28425	0.0313679		4	26	0.434885	0.369758	0.09375	0.129	0.253	0.74275	1.135	0.150934		4	26	0.107769	0.11883	0.011
	5	26	0.084	0.105185	0.011	0.011	0.051	0.12475	0.317	0.0476872		5	26	1.02169	0.942385	0.23575	0.42	0.63	1.223	3.128	0.54694		5	26	0.114808	0.118781	0.011	0.011	0.073	0.157	0.356	0.0422207		5	26	0.492462	0.445248	0.08825	0.1865	0.308	0.6125	1.439	0.20361		5	26	0.126885	0.134091	0.011
	6	26	0.1164	0.128673	0.011	0.011	0.0845	0.117	0.40775	0.0706322		6	26	1.16976	1.27881	0.194	0.5385	0.745	1.06925	4.14325	0.810509		6	26	0.14852	0.163331	0.011	0.0585	0.093	0.15325	0.5335	0.0625732		6	26	0.60312	0.622895	0.085	0.295	0.4015	0.559	2.171	0.301927		6	26	0.16704	0.179877	0.011
	7	25	0.11296	0.137966	0.011	0.011	0.085	0.128	0.4632	0.0988926		7	25	1.14628	1.47085	0.2348	0.493	0.692	1.044	4.5324	1.13358		7	25	0.15316	0.20624	0.011	0.064	0.093	0.148	0.6596	0.0874858		7	25	0.64668	0.76928	0.0998	0.315	0.427	0.562	2.494	0.42086		7	25	0.18096	0.241216	0.011
	8	26	0.0613462	0.0709264	0.011	0.011	0.0325	0.08275	0.17	0.0912981		8	26	0.760154	0.763992	0.22475	0.3405	0.518	0.7475	2.22925	1.04254		8	26	0.0764231	0.0833226	0.011	0.011	0.0575	0.097	0.23975	0.0803683		8	26	0.391077	0.308654	0.0945	0.199	0.3185	0.45725	1.03825	0.382821		8	26	0.0995385	0.104019	0.011
	9	26	0.041	0.0346952	0.011	0.011	0.0415	0.05525	0.11325	0.0703724		9	26	0.540231	0.370797	0.2515	0.32075	0.4165	0.52025	1.31475	0.797048		9	26	0.0628077	0.0623744	0.011	0.011	0.057	0.0765	0.196	0.0612942		9	26	0.318846	0.214366	0.12525	0.19375	0.2555	0.34875	0.84375	0.285894		9	26	0.0626923	0.0663902	0.011
	10	26	0.0345	0.0277276	0.011	0.011	0.0225	0.05375	0.08275	0.0562601		10	26	0.441038	0.189059	0.2605	0.3215	0.3805	0.515	0.791	0.627768		10	26	0.0538462	0.0558123	0.011	0.011	0.025	0.0715	0.15725	0.0480614		10	26	0.285692	0.172501	0.106	0.167	0.2225	0.3605	0.648	0.215837		10	26	0.0567692	0.0600489	0.011
	11	26	0.02024	0.0178106	0.011	0.011	0.011	0.011	0.05575	0.0422404		11	26	0.37732	0.167212	0.2	0.28075	0.3295	0.401	0.647	0.460249		11	26	0.02908	0.0297839	0.011	0.011	0.011	0.0455	0.07975	0.0349877		11	26	0.21076	0.0993064	0.058	0.15675	0.1865	0.255	0.35575	0.148187		11	26	0.0286	0.0310667	0.011
	12	26	0.0289583	0.0241554	0.00275	0.011	0.011	0.046	0.07175	0.032255		12	26	0.375667	0.150083	0.05575	0.25225	0.3635	0.44325	0.5305	0.341043		12	26	0.0495833	0.0627696	0.00275	0.011	0.0285	0.05925	0.09425	0.0256986		12	26	0.26	0.165595	0.02	0.163	0.2195	0.2675	0.459	0.101637		12	26	0.0481667	0.0761657	0.00275
	13	26	0.0305652	0.0264431	0	0.011	0.011	0.04275	0.07175	0.029708		13	26	0.426609	0.184642	0	0.3135	0.389	0.47725	0.6	0.304785		13	26	0.0612609	0.0510506	0	0.011	0.05	0.06775	0.16725	0.0227709		13	26	0.286696	0.168153	0	0.1645	0.2355	0.35775	0.553	0.0847678		13	26	0.0628696	0.0610436	0
	14	26	0.0287826	0.0246402	0	0.011	0.011	0.0475	0.0725	0.0273744		14	26	0.400826	0.164467	0	0.3005	0.3425	0.447	0.59225	0.275673		14	26	0.0432174	0.0370646	0	0.011	0.011	0.06375	0.1135	0.0204967		14	26	0.239435	0.129547	0	0.16175	0.213	0.29275	0.41825	0.0743419		14	26	0.0484348	0.0481005	0
	15	26	0.04176	0.0297761	0.011	0.011	0.037	0.06475	0.0855	0.0284278		15	26	0.47064	0.175829	0.2355	0.366	0.425	0.54225	0.7345	0.285583		15	26	0.0624	0.0396454	0.011	0.01775	0.062	0.08625	0.1265	0.0212319		15	26	0.28488	0.129859	0.0465	0.2045	0.2465	0.352	0.47725	0.0776868		15	26	0.06492	0.0577596	0.011
	16	26	0.0683462	0.0319762	0.011	0.05	0.0665	0.0865	0.122	0.0334753		16	26	0.624385	0.18948	0.40425	0.46925	0.5495	0.778	0.94475	0.348109		16	26	0.0833077	0.0428054	0.011	0.06125	0.078	0.11275	0.1515	0.0261521		16	26	0.358115	0.147052	0.206	0.285	0.3085	0.46375	0.63025	0.104032		16	26	0.0967692	0.0606645	0.011
	17	26	0.0814615	0.0551806	0.011	0.06125	0.074	0.09375	0.159	0.0379811		17	26	0.723538	0.277953	0.4605	0.51775	0.6965	0.776	1.34375	0.405372		17	26	0.103769	0.0500762	0.06025	0.07025	0.086	0.113	0.2225	0.0306805		17	26	0.423269	0.18651	0.257	0.30225	0.369	0.47175	0.849	0.128682		17	26	0.124731	0.0657252	0.05875
	18	25	0.09716	0.0705394	0.0484	0.058	0.078	0.093	0.2032	0.0403127		18	25	0.76848	0.297648	0.472	0.64	0.718	0.806	1.2748	0.439258		18	25	0.11036	0.0488329	0.0562	0.077	0.099	0.137	0.1866	0.0334392		18	25	0.44112	0.175614	0.2648	0.348	0.396	0.505	0.7836	0.146167		18	25	0.12472	0.0606805	0.0662
	19	24	0.102542	0.0615199	0.04915	0.066	0.0865	0.1265	0.19505	0.0360771		19	24	0.86175	0.413689	0.4668	0.59325	0.7975	0.8805	1.67695	0.396774		19	24	0.12	0.0592137	0.0539	0.07925	0.107	0.14525	0.22995	0.0302845		19	24	0.486083	0.223166	0.2565	0.33	0.4335	0.52275	0.9264	0.134841		19	24	0.136875	0.0760173	0.06815
	20	24	0.0966667	0.0418264	0.0406	0.06275	0.098	0.118	0.1653	0.0371176		20	24	0.896833	0.341489	0.42125	0.73225	0.8285	1.06575	1.51975	0.412984		20	24	0.124458	0.0541985	0.05515	0.09175	0.111	0.15525	0.21945	0.031624		20	24	0.516375	0.199767	0.24305	0.38975	0.4745	0.672	0.82775	0.144129		20	24	0.154792	0.0688451	0.057
	21	24	0.087625	0.0510437	0.0155	0.058	0.068	0.11675	0.1731	0.0478291		21	24	0.856958	0.392195	0.41275	0.65425	0.7645	1.01725	1.52715	0.539367		21	24	0.124875	0.0676451	0.054	0.078	0.112	0.15825	0.2521	0.0414517		21	24	0.51675	0.245525	0.2366	0.33975	0.4575	0.705	0.96085	0.193838		21	24	0.147583	0.0860379	0.05445
	22	26	0.0806364	0.0650442	0	0.01725	0.0595	0.08775	0.21575	0.0428112		22	26	0.798227	0.547817	0	0.36075	0.64	0.82675	1.782	0.484022		22	26	0.107227	0.0731692	0	0.0415	0.087	0.12175	0.2275	0.0372231		22	26	0.430455	0.263642	0	0.1985	0.363	0.512	0.85575	0.174841		22	26	0.112636	0.090236	0
	23	26	0.0773462	0.0697624	0.011	0.011	0.064	0.11075	0.233	0.0353866		23	26	0.804538	0.495169	0.253	0.49	0.7595	0.892	1.9355	0.401232		23	26	0.103	0.0719811	0.011	0.06175	0.093	0.142	0.2365	0.0308791		23	26	0.436577	0.244762	0.13425	0.2505	0.4195	0.52725	0.93725	0.14578		23	26	0.121654	0.0937836	0.011
Terpenoids	Isoprene											A-Pinene
		Observations								Simulation			Observations								Simulation
	Hour	Number of sampling	Mean	Standard deviation	5th percentile	25th percentile	Median	75th percentile	95th percentile	Modeled Concentration		Hour	Number of sampling	Mean	Standard deviation	5th percentile	25th percentile	Median	75th percentile	95th percentile	Modeled Concentration
	0	62	0.0438548	0.0576049	0.011	0.011	0.011	0.068	0.13665	0.0526115		0	26	0.0204231	0.0205566	0.011	0.011	0.011	0.02075	0.063	0.00157234
	1	62	0.0490645	0.117694	0.011	0.011	0.011	0.011	0.13955	0.048261		1	26	0.0246154	0.0190244	0.011	0.011	0.011	0.036	0.06575	0.0018548
	2	62	0.0328387	0.0500957	0.011	0.011	0.011	0.011	0.13905	0.042161		2	26	0.0233077	0.0195648	0.011	0.011	0.011	0.03525	0.06275	0.00204323
	3	62	0.0481935	0.0947102	0.011	0.011	0.011	0.011	0.20235	0.0434826		3	26	0.0264231	0.0215577	0.011	0.011	0.011	0.0385	0.06675	0.00259445
	4	62	0.052871	0.114476	0.011	0.011	0.011	0.011	0.29695	0.0464605		4	26	0.0303077	0.0269737	0.011	0.011	0.011	0.04775	0.07275	0.00322164
	5	62	0.0590806	0.101249	0.011	0.011	0.011	0.06375	0.27175	0.0730415		5	26	0.0418462	0.032824	0.011	0.011	0.037	0.073	0.096	0.00525227
	6	62	0.120677	0.163566	0.011	0.011	0.064	0.15375	0.40995	0.292045		6	26	0.03992	0.0317617	0.011	0.011	0.0345	0.052	0.0945	0.00980576
	7	62	0.220403	0.240759	0.011	0.071	0.144	0.284	0.5951	0.439152		7	25	0.03636	0.0284969	0.011	0.011	0.034	0.054	0.0788	0.0134263
	8	62	0.246435	0.230714	0.011	0.08	0.152	0.379	0.6994	0.544647		8	26	0.0272308	0.0195761	0.011	0.011	0.0205	0.03675	0.0655	0.0116185
	9	62	0.243613	0.237486	0.011	0.08675	0.168	0.338	0.64545	0.418629		9	26	0.0256538	0.0184151	0.011	0.011	0.011	0.0445	0.053	0.00912343
	10	62	0.215968	0.196857	0.011	0.101	0.154	0.25675	0.70525	0.279548		10	26	0.0225769	0.0172909	0.011	0.011	0.011	0.034	0.05725	0.00647713
	11	62	0.202371	0.223996	0.011	0.071	0.134	0.2535	0.54615	0.20777		11	26	0.01776	0.0126489	0.011	0.011	0.011	0.011	0.03975	0.00390308
	12	62	0.230306	0.221047	0.011	0.1035	0.1685	0.29075	0.67695	0.133277		12	26	0.0190833	0.0130202	0.00275	0.011	0.011	0.02825	0.039	0.00267914
	13	62	0.22929	0.199961	0.011	0.09125	0.177	0.29675	0.6643	0.104143		13	26	0.0196522	0.0144667	0	0.011	0.011	0.0245	0.0445	0.0021637
	14	62	0.218258	0.146091	0.011	0.129	0.1815	0.2795	0.4759	0.0978694		14	26	0.0256957	0.0197718	0	0.011	0.011	0.04	0.05225	0.00194704
	15	62	0.278016	0.190545	0.07435	0.168	0.2255	0.342	0.6935	0.118127		15	26	0.02296	0.0162971	0.011	0.011	0.011	0.03475	0.04925	0.00207428
	16	62	0.274258	0.178482	0.0893	0.146	0.2435	0.34025	0.6092	0.154034		16	26	0.0246923	0.0147886	0.011	0.011	0.02	0.03675	0.0455	0.00269978
	17	62	0.24671	0.164622	0.0723	0.13975	0.1955	0.3035	0.5673	0.198989		17	26	0.0255769	0.0158245	0.011	0.011	0.0185	0.039	0.049	0.00333817
	18	62	0.235177	0.204496	0.0711	0.1135	0.1775	0.27025	0.75305	0.252369		18	25	0.0262	0.0208167	0.011	0.011	0.011	0.045	0.0576	0.00378082
	19	62	0.234806	0.235745	0.0541	0.10025	0.17	0.278	0.61725	0.254478		19	24	0.0280417	0.0187744	0.011	0.011	0.0185	0.04325	0.056	0.00299613
	20	62	0.168048	0.13657	0.011	0.07325	0.139	0.242	0.40935	0.211758		20	24	0.0305	0.0187732	0.011	0.011	0.0285	0.0405	0.0691	0.00251413
	21	62	0.116242	0.13075	0.011	0.011	0.061	0.18575	0.421	0.158037		21	24	0.0286667	0.0252976	0.011	0.011	0.0175	0.0355	0.07735	0.00290844
	22	62	0.080129	0.115564	0.011	0.011	0.011	0.09275	0.31955	0.0972968		22	26	0.0207273	0.0183896	0	0.011	0.011	0.011	0.062	0.00125931
	23	62	0.0458226	0.0710441	0.011	0.011	0.011	0.0515	0.23505	0.0611829		23	26	0.0222692	0.0187991	0.011	0.011	0.011	0.025	0.065	0.00105333
Alkanes	Decane											Nonane											Heptane											Cyclohexane											Hexane
		Observations								Simulation			Observations								Simulation			Observations								Simulation			Observations								Simulation			Observations
	Hour	Number of sampling	Mean	Standard deviation	5th percentile	25th percentile	Median	75th percentile	95th percentile	Modeled Concentration		Hour	Number of sampling	Mean	Standard deviation	5th percentile	25th percentile	Median	75th percentile	95th percentile	Modeled Concentration		Hour	Number of sampling	Mean	Standard deviation	5th percentile	25th percentile	Median	75th percentile	95th percentile	Modeled Concentration		Hour	Number of sampling	Mean	Standard deviation	5th percentile	25th percentile	Median	75th percentile	95th percentile	Modeled Concentration		Hour	Number of sampling	Mean	Standard deviation	5th percentile
	0	26	0.0807692	0.0501656	0.011	0.0645	0.0825	0.10475	0.1655	0.0149068		0	26	0.0499615	0.0410935	0.011	0.011	0.057	0.078	0.12575	0.00844375		0	26	0.195346	0.120257	0.05725	0.08625	0.174	0.27975	0.38475	0.066289		0	26	0.0615	0.0390151	0.011	0.04225	0.056	0.08925	0.12375	0.0107724		0	26	0.0945	0.0726032	0.002
	1	26	0.0859615	0.049954	0.015	0.06025	0.079	0.11175	0.17325	0.0150184		1	26	0.0515	0.0389761	0.011	0.011	0.059	0.0855	0.10675	0.00850264		1	26	0.193192	0.115716	0.05525	0.08425	0.177	0.27475	0.37725	0.0666644		1	26	0.0651538	0.0527846	0.011	0.011	0.0605	0.09025	0.17125	0.0108343		1	26	0.126885	0.107915	0.002
	2	26	0.0792692	0.0597358	0.011	0.04775	0.0615	0.08175	0.201	0.0137281		2	26	0.045	0.0476689	0.011	0.011	0.011	0.074	0.1355	0.00776909		2	26	0.181846	0.110918	0.05075	0.0695	0.165	0.275	0.363	0.0608518		2	26	0.0575	0.0457744	0.011	0.011	0.0625	0.0835	0.1345	0.00989021		2	26	0.0906538	0.104962	0.002
	3	26	0.079	0.0733545	0.011	0.0185	0.051	0.11325	0.233	0.014293		3	26	0.0492692	0.0558086	0.011	0.011	0.011	0.07275	0.1595	0.00808618		3	26	0.179615	0.110766	0.0515	0.06775	0.1635	0.263	0.37875	0.0632833		3	26	0.0549231	0.0452123	0.011	0.011	0.0445	0.0915	0.1265	0.0102859		3	26	0.0812692	0.100851	0.002
	4	26	0.0787308	0.0755574	0.011	0.01525	0.0555	0.107	0.23025	0.0151524		4	26	0.0551923	0.0560899	0.011	0.011	0.011	0.0975	0.15475	0.00857028		4	26	0.183231	0.116789	0.05625	0.06925	0.155	0.27825	0.3845	0.0670298		4	26	0.0747692	0.0832453	0.011	0.011	0.064	0.1125	0.15825	0.0108953		4	26	0.115538	0.12876	0.002
	5	26	0.0774231	0.0798354	0.011	0.02975	0.056	0.099	0.26825	0.0204126		5	26	0.0494231	0.0624072	0.011	0.011	0.011	0.08875	0.1865	0.0115426		5	26	0.163769	0.121117	0.021	0.05975	0.1275	0.26875	0.38525	0.0902201		5	26	0.0896538	0.118387	0.011	0.011	0.0575	0.10375	0.35525	0.0146653		5	26	0.116385	0.163258	0.002
	6	26	0.07904	0.0846825	0.011	0.03525	0.054	0.07975	0.2785	0.0302596		6	26	0.05344	0.0695121	0.011	0.011	0.011	0.06725	0.21775	0.0171096		6	26	0.194	0.124884	0.0545	0.083	0.159	0.26475	0.40225	0.133709		6	26	0.13784	0.392136	0.011	0.011	0.044	0.0915	0.19325	0.0217348		6	26	0.14964	0.217789	0.002
	7	25	0.1032	0.0906886	0.0284	0.05	0.078	0.107	0.2944	0.0422616		7	25	0.09084	0.0861659	0.011	0.011	0.061	0.105	0.2582	0.0239035		7	25	0.20756	0.130508	0.0622	0.095	0.18	0.31	0.45	0.186943		7	25	0.0688	0.0867165	0.011	0.011	0.044	0.091	0.2694	0.0303867		7	25	0.17008	0.304822	0.002
	8	26	0.112808	0.0773899	0.015	0.06975	0.101	0.151	0.2005	0.0386856		8	26	0.0805769	0.0634666	0.011	0.02025	0.082	0.1105	0.18325	0.0219037		8	26	0.211846	0.15337	0.06475	0.08825	0.1815	0.2595	0.54675	0.171732		8	26	0.0578462	0.0744229	0.011	0.011	0.0405	0.07775	0.1245	0.02791		8	26	0.0801538	0.123761	0.002
	9	26	0.120231	0.066183	0.037	0.0625	0.103	0.16775	0.22875	0.0292806		9	26	0.0828462	0.0613102	0.011	0.01925	0.0715	0.1185	0.198	0.0166155		9	26	0.186731	0.10753	0.06725	0.077	0.1765	0.26825	0.3545	0.130971		9	26	0.0419615	0.037109	0.011	0.011	0.011	0.0775	0.104	0.0212787		9	26	0.0456538	0.0539051	0.002
	10	26	0.113731	0.074913	0.01875	0.065	0.094	0.1465	0.25825	0.0226432		10	26	0.062	0.0646195	0.011	0.011	0.0555	0.08175	0.2105	0.0129011		10	26	0.188077	0.109758	0.06675	0.09225	0.171	0.2815	0.37375	0.102692		10	26	0.0502692	0.0369156	0.011	0.011	0.0445	0.07275	0.1105	0.0166743		10	26	0.0420385	0.0574021	0.002
	11	26	0.07544	0.0386784	0.01475	0.04775	0.068	0.09	0.14325	0.0161276		11	26	0.02712	0.0275636	0.011	0.011	0.011	0.0395	0.08125	0.00924735		11	26	0.17428	0.102596	0.05	0.07675	0.1525	0.26425	0.31675	0.0747524		11	26	0.03096	0.0315129	0.011	0.011	0.011	0.046	0.0815	0.0121265		11	26	0.0226	0.0300407	0.002
	12	26	0.0821667	0.0413412	0.00825	0.04425	0.0785	0.104	0.1465	0.0115345		12	26	0.0435	0.0338664	0.00275	0.011	0.0275	0.07175	0.09075	0.00666456		12	26	0.185417	0.13304	0.0145	0.0735	0.1495	0.24625	0.38525	0.0549015		12	26	0.0387917	0.0320787	0.00275	0.011	0.0235	0.057	0.0995	0.00889598		12	26	0.0448333	0.0590668	0.0005
	13	26	0.115652	0.084714	0	0.04	0.08	0.15625	0.234	0.00996761		13	26	0.0784783	0.0584255	0	0.011	0.0625	0.104	0.17125	0.00580009		13	26	0.259957	0.278478	0	0.0735	0.1335	0.26275	0.882	0.048643		13	26	0.0472609	0.0358363	0	0.011	0.0435	0.0705	0.102	0.00787316		13	26	0.0401304	0.0466435	0
	14	26	0.108043	0.0691434	0	0.041	0.0895	0.135	0.2075	0.00885779		14	26	0.058087	0.0506092	0	0.011	0.031	0.0815	0.14	0.0051719		14	26	0.213826	0.150186	0	0.076	0.184	0.26525	0.4135	0.0437831		14	26	0.0372609	0.0328237	0	0.011	0.011	0.0575	0.09725	0.00708223		14	26	0.034	0.0355246	0
	15	26	0.07808	0.0393608	0.01575	0.05125	0.0715	0.09575	0.13375	0.00918845		15	26	0.03944	0.0321558	0.011	0.011	0.011	0.067	0.08575	0.00536148		15	26	0.1948	0.124867	0.066	0.084	0.1815	0.2545	0.413	0.0453535		15	26	0.0394	0.0383451	0.011	0.011	0.011	0.05475	0.11225	0.00733634		15	26	0.0386	0.036783	0.002
	16	26	0.0750385	0.0269258	0.04125	0.05375	0.067	0.09775	0.118	0.0116886		16	26	0.0367308	0.0299273	0.011	0.011	0.011	0.06375	0.0845	0.0067568		16	26	0.192269	0.112295	0.07275	0.10075	0.1795	0.26575	0.40875	0.055869		16	26	0.0461538	0.0422352	0.011	0.011	0.0375	0.06575	0.1255	0.00904973		16	26	0.0551154	0.0388693	0.002
	17	26	0.0698462	0.0351894	0.03175	0.053	0.0635	0.07975	0.14725	0.0140129		17	26	0.0303462	0.0330405	0.011	0.011	0.011	0.056	0.1	0.00805105		17	26	0.195077	0.108571	0.07325	0.098	0.1955	0.28575	0.4045	0.0655474		17	26	0.0530769	0.0456061	0.011	0.011	0.042	0.08075	0.13475	0.0106277		17	26	0.0828462	0.0503259	0.01225
	18	25	0.07364	0.0292516	0.0366	0.058	0.069	0.085	0.1192	0.0155326		18	25	0.0326	0.0316083	0.011	0.011	0.011	0.058	0.0868	0.00888203		18	25	0.19908	0.107143	0.0804	0.094	0.187	0.285	0.4098	0.071445		18	25	0.04588	0.0386882	0.011	0.011	0.03	0.077	0.1106	0.0115926		18	25	0.0862	0.0594313	0.002
	19	24	0.071125	0.0253931	0.03945	0.05425	0.0685	0.08025	0.12145	0.0141741		19	24	0.0264583	0.0288187	0.011	0.011	0.011	0.021	0.085	0.00808804		19	24	0.201292	0.109397	0.0753	0.08925	0.201	0.27775	0.40355	0.0647066		19	24	0.0517083	0.043239	0.011	0.011	0.046	0.078	0.116	0.0105028		19	24	0.111542	0.0744259	0.00635
	20	24	0.0827083	0.0452361	0.0376	0.05775	0.0685	0.085	0.1849	0.0149408		20	24	0.0469167	0.0419543	0.011	0.011	0.0305	0.07375	0.12665	0.00850307		20	24	0.203542	0.107829	0.07615	0.1045	0.2005	0.27175	0.4089	0.0675709		20	24	0.0649583	0.0463122	0.011	0.011	0.068	0.079	0.12985	0.0109723		20	24	0.133208	0.0760675	0.0328
	21	24	0.0840833	0.0413279	0.04045	0.0555	0.07	0.10075	0.1669	0.0197897		21	24	0.0469167	0.0426298	0.011	0.011	0.011	0.08575	0.1112	0.0112297		21	24	0.192792	0.111728	0.0743	0.09475	0.1745	0.25975	0.413	0.0885735		21	24	0.05725	0.0394277	0.011	0.011	0.0565	0.07975	0.119	0.0143895		21	24	0.10125	0.0606496	0.0353
	22	26	0.0691818	0.0376151	0	0.035	0.057	0.07425	0.12575	0.0178058		22	26	0.0350455	0.0371084	0	0.011	0.011	0.04925	0.09875	0.0100987		22	26	0.2255	0.142623	0	0.07175	0.1785	0.2835	0.4045	0.0795409		22	26	0.0649545	0.0501043	0	0.011	0.05	0.099	0.13375	0.0129232		22	26	0.1015	0.0764834	0
	23	26	0.078	0.0417967	0.015	0.05425	0.0735	0.09925	0.1495	0.0148028		23	26	0.044	0.0403871	0.011	0.011	0.011	0.0745	0.11425	0.00839052		23	26	0.204769	0.123753	0.061	0.09125	0.1765	0.27975	0.401	0.0659859		23	26	0.0686538	0.0479382	0.011	0.017	0.06	0.113	0.1395	0.0107219		23	26	0.102846	0.07354	0.002
Alkynes	Acetylene
		Observations								Simulation
	Hour	Number of sampling	Mean	Standard deviation	5th percentile	25th percentile	Med	75th percentile	95th percentile	Modeled Concentration
	0	62	0.362677	0.28794	0.011	0.19125	0.315	0.43025	0.8326	0.156866
	1	62	0.309919	0.232159	0.0165	0.1765	0.2485	0.37825	0.6913	0.157245
	2	62	0.312645	0.248227	0.01655	0.16525	0.2405	0.3655	0.82315	0.143178
	3	62	0.366113	0.310932	0.011	0.18575	0.273	0.48125	0.86465	0.148598
	4	62	0.409194	0.30527	0.011	0.226	0.308	0.51175	1.0637	0.157154
	5	62	0.515629	0.374408	0.011	0.31075	0.4575	0.56675	1.48895	0.211199
	6	62	0.698581	0.578719	0.163	0.39225	0.4975	0.77675	1.9432	0.312845
	7	62	0.717613	0.554346	0.2169	0.34525	0.5275	0.8195	2.1341	0.43807
	8	62	0.535065	0.337299	0.22855	0.35225	0.4065	0.61325	1.34755	0.404554
	9	62	0.424823	0.252727	0.2093	0.29225	0.377	0.45875	0.93915	0.312057
	10	62	0.354871	0.143603	0.2053	0.2475	0.328	0.41225	0.6258	0.249833
	11	62	0.305952	0.120117	0.1872	0.2265	0.2795	0.36675	0.4598	0.188021
	12	62	0.269823	0.139476	0.011	0.189	0.26	0.36275	0.4972	0.144027
	13	62	0.253629	0.144602	0.011	0.17725	0.265	0.33425	0.5005	0.133087
	14	62	0.283145	0.141283	0.011	0.21375	0.275	0.3615	0.48075	0.122898
	15	62	0.351677	0.145492	0.2075	0.25825	0.3395	0.4155	0.6024	0.127684
	16	62	0.418968	0.156151	0.2143	0.3185	0.4115	0.49325	0.7155	0.14983
	17	62	0.456484	0.130767	0.293	0.36225	0.418	0.54225	0.66445	0.169502
	18	62	0.558597	0.368785	0.30895	0.38925	0.4715	0.62675	0.8635	0.179471
	19	62	0.56121	0.2159	0.31905	0.4275	0.5275	0.671	0.92425	0.160404
	20	62	0.474258	0.212771	0.26305	0.3355	0.41	0.54625	0.86065	0.164807
	21	62	0.485855	0.23508	0.21305	0.3755	0.427	0.605	0.94685	0.212101
	22	62	0.457065	0.29981	0.17395	0.28875	0.3635	0.48125	1.12535	0.189778
	23	62	0.392581	0.277572	0.1224	0.23225	0.2985	0.4655	0.93685	0.156826
Alkenes	Ethylene											Propene											Trans-But2ene											2-methyl-Propene											1,3-butadiène
		Observations								Simulation		Observations									Simulation		Observations									Simulation		Observations									Simulation		Observations
	Hour	Number of sampling	Mean	Standard deviation	5th percentile	25th percentile	Med	75th percentile	95th percentile	Modeled Concentration		Hour	Number of sampling	Mean	Standard deviation	5th percentile	25th percentile	Med	75th percentile	95th percentile	Modeled Concentration		Hour	Number of sampling	Mean	Standard deviation	5th percentile	25th percentile	Med	75th percentile	95th percentile	Modeled Concentration		Hour	Number of sampling	Mean	Standard deviation	5th percentile	25th percentile	Med	75th percentile	95th percentile	Modeled Concentration		Hour	Number of sampling	Mean	Standard deviation	5th percentile
	0	62	0.632258	0.992799	0.011	0.19525	0.347	0.55275	1.8066	0.247267		0	62	0.128387	0.122011	0.011	0.011	0.0995	0.16425	0.38665	0.0626643		0	62	0.0485484	0.0440449	0.011	0.011	0.048	0.06975	0.14585	0.00518546		0	62	0.131113	0.0672948	0.0532	0.0875	0.114	0.1655	0.2658	0.0227001		0	62	0.0610806	0.0452013	0.011
	1	62	0.497758	0.651347	0.011	0.177	0.281	0.56275	1.54315	0.2489		1	62	0.102242	0.110416	0.011	0.011	0.0805	0.13625	0.3639	0.0636469		1	62	0.0432097	0.0470936	0.011	0.011	0.011	0.07	0.1375	0.00562376		1	62	0.114952	0.0560674	0.04705	0.077	0.1145	0.1465	0.22245	0.0235936		1	62	0.0644839	0.0523305	0.011
	2	62	0.4835	0.595665	0.011	0.0425	0.2325	0.57975	1.8327	0.227413		2	62	0.0992742	0.126944	0.011	0.011	0.036	0.1455	0.40005	0.0586346		2	62	0.0451935	0.0587735	0.011	0.011	0.011	0.056	0.1937	0.00554767		2	62	0.105145	0.0685752	0.011	0.0625	0.0865	0.1455	0.245	0.022272		2	62	0.0569839	0.0609882	0.011
	3	62	0.535161	0.631265	0.011	0.1505	0.2715	0.6275	2.10625	0.236739		3	62	0.118258	0.145439	0.011	0.011	0.0705	0.178	0.4089	0.0615405		3	62	0.0497742	0.062385	0.011	0.011	0.011	0.069	0.1999	0.0062675		3	62	0.114435	0.0640473	0.011	0.0765	0.105	0.152	0.2457	0.0240115		3	62	0.0568548	0.068944	0.011
	4	62	0.629242	0.651764	0.011	0.2455	0.3325	0.791	2.11095	0.250996		4	62	0.143484	0.159802	0.011	0.011	0.095	0.175	0.5276	0.0657283		4	62	0.063129	0.0888442	0.011	0.011	0.011	0.06775	0.1958	0.0071749		4	62	0.120694	0.080827	0.011	0.06525	0.105	0.14625	0.2953	0.0262634		4	62	0.0542419	0.0618676	0.011
	5	62	0.800032	0.803564	0.011	0.355	0.535	0.84075	2.7725	0.33839		5	62	0.205613	0.214726	0.011	0.088	0.1405	0.221	0.73725	0.0895994		5	62	0.0668871	0.0962977	0.011	0.011	0.027	0.0725	0.2912	0.0111897		5	62	0.137387	0.0900665	0.011	0.0845	0.12	0.1595	0.3226	0.0372002		5	62	0.0535484	0.0603742	0.011
	6	62	1.08935	1.09041	0.017	0.4385	0.7465	1.248	3.39165	0.502171		6	62	0.281355	0.272796	0.011	0.119	0.185	0.3485	0.9725	0.133881		6	62	0.0719677	0.0762584	0.011	0.011	0.0555	0.079	0.23885	0.0183015		6	62	0.189419	0.115357	0.06015	0.12575	0.15	0.23	0.4484	0.056846		6	62	0.0723387	0.0626222	0.011
	7	62	0.966806	0.859985	0.21055	0.4025	0.6125	1.08725	2.7278	0.702338		7	62	0.256694	0.222806	0.011	0.10575	0.195	0.3295	0.67395	0.186512		7	62	0.0606774	0.0558199	0.011	0.011	0.051	0.08725	0.17785	0.0255414		7	62	0.20471	0.106349	0.0942	0.1355	0.167	0.24975	0.4576	0.0793155		7	62	0.0804839	0.0695811	0.011
	8	62	0.698887	0.592189	0.22105	0.318	0.4645	0.90725	1.9393	0.644842		8	62	0.172016	0.137104	0.0136	0.093	0.122	0.22	0.4761	0.168037		8	62	0.0532742	0.0591755	0.011	0.011	0.0465	0.07	0.16635	0.0214589		8	62	0.174952	0.0899673	0.07365	0.12325	0.155	0.2095	0.35775	0.0702231		8	62	0.0715	0.0632838	0.011
	9	62	0.479823	0.424766	0.14975	0.25225	0.3655	0.5915	1.61665	0.491049		9	62	0.120048	0.094698	0.011	0.07225	0.102	0.14425	0.30635	0.123014		9	62	0.0450645	0.0349997	0.011	0.011	0.0485	0.064	0.09865	0.0140133		9	62	0.170048	0.0812635	0.0883	0.1145	0.155	0.21775	0.29595	0.0493951		9	62	0.0640968	0.0588771	0.011
	10	62	0.41579	0.270927	0.1841	0.24025	0.3585	0.4775	0.97645	0.38386		10	62	0.104855	0.0740912	0.011	0.06825	0.088	0.13275	0.1835	0.0896717		10	62	0.0487742	0.0400293	0.011	0.011	0.049	0.06675	0.12355	0.0086937		10	62	0.174435	0.0830782	0.10305	0.12575	0.157	0.19175	0.3312	0.0335641		10	62	0.0618548	0.0747735	0.011
	11	62	0.313645	0.20268	0.011	0.19725	0.27	0.37175	0.67955	0.278045		11	62	0.0803226	0.05238	0.011	0.061	0.079	0.112	0.16315	0.0584533		11	62	0.0408065	0.0348993	0.011	0.011	0.0275	0.059	0.1147	0.00473261		11	62	0.160306	0.0613284	0.0872	0.12225	0.151	0.19575	0.23995	0.0197926		11	62	0.0357742	0.0485516	0.011
	12	62	0.271339	0.171163	0.011	0.187	0.2565	0.35975	0.592	0.202968		12	62	0.0759677	0.0477806	0.011	0.011	0.0785	0.10775	0.14685	0.0379552		12	62	0.0475645	0.0563367	0.011	0.011	0.011	0.06875	0.1263	0.00282328		12	62	0.151161	0.0761054	0.011	0.1075	0.1535	0.18475	0.28595	0.0117452		12	62	0.0370806	0.0320012	0.011
	13	62	0.260145	0.16871	0.011	0.17575	0.253	0.35175	0.58235	0.178746		13	62	0.0749516	0.0537768	0.011	0.011	0.077	0.10975	0.1579	0.0303332		13	62	0.040871	0.0386902	0.011	0.011	0.011	0.06375	0.11485	0.00218452		13	62	0.146613	0.0817372	0.011	0.12025	0.1545	0.18475	0.30225	0.00893147		13	62	0.0385645	0.0348428	0.011
	14	62	0.268355	0.190799	0.011	0.1655	0.2495	0.34775	0.545	0.160305		14	62	0.0980645	0.0703828	0.011	0.0615	0.0875	0.1325	0.2133	0.0263463		14	62	0.0409355	0.0403736	0.011	0.011	0.011	0.06525	0.1007	0.00197977		14	62	0.159065	0.0873168	0.011	0.126	0.146	0.17975	0.31125	0.00786023		14	62	0.0381452	0.0301678	0.011
	15	62	0.366484	0.214396	0.011	0.2465	0.321	0.471	0.73315	0.165934		15	62	0.113645	0.0669771	0.011	0.08225	0.108	0.1585	0.19795	0.0279223		15	62	0.0458387	0.0355367	0.011	0.011	0.046	0.06375	0.0956	0.00215003		15	62	0.168355	0.0659217	0.1072	0.128	0.151	0.20275	0.30175	0.00863614		15	62	0.0497097	0.0450094	0.011
	16	62	0.450677	0.226123	0.19735	0.32175	0.4085	0.4885	0.9204	0.205756		16	62	0.134645	0.0639206	0.011	0.10625	0.1315	0.17	0.2466	0.0400488		16	62	0.0565484	0.051722	0.011	0.011	0.053	0.0685	0.13965	0.00358366		16	62	0.182484	0.0910616	0.10305	0.14075	0.166	0.20425	0.351	0.0138771		16	62	0.0466129	0.038017	0.011
	17	62	0.527097	0.236937	0.2447	0.36025	0.495	0.61175	1.0241	0.242351		17	62	0.169871	0.0735787	0.09105	0.1185	0.1505	0.1945	0.29445	0.0512028		17	62	0.0520968	0.0473569	0.011	0.011	0.052	0.06575	0.13555	0.00451826		17	62	0.187935	0.0723328	0.11705	0.14225	0.171	0.2085	0.36475	0.0186827		17	62	0.0458387	0.0383796	0.011
	18	62	0.794565	1.02373	0.3052	0.44375	0.599	0.78475	1.2091	0.264883		18	62	0.238758	0.354291	0.0852	0.12525	0.1575	0.22925	0.4533	0.0596102		18	62	0.0671774	0.084873	0.011	0.011	0.054	0.06475	0.215	0.00515383		18	62	0.182339	0.0590984	0.11315	0.1485	0.1665	0.19675	0.30785	0.0226995		18	62	0.048871	0.0319397	0.011
	19	62	0.836839	0.729749	0.2998	0.448	0.7495	0.9105	1.878	0.239885		19	62	0.286468	0.34428	0.1162	0.153	0.207	0.266	0.5663	0.0552587		19	62	0.112387	0.305562	0.011	0.02	0.061	0.087	0.2837	0.00416731		19	62	0.185887	0.057734	0.11445	0.1465	0.172	0.20725	0.2895	0.0212916		19	62	0.0558548	0.0334781	0.011
	20	62	0.660484	0.37484	0.1991	0.43175	0.6135	0.7665	1.4346	0.250897		20	62	0.192613	0.115487	0.072	0.129	0.1675	0.2235	0.4044	0.0599354		20	62	0.0634355	0.0826332	0.011	0.011	0.0515	0.07075	0.1426	0.00477955		20	62	0.164194	0.0618292	0.08025	0.13225	0.157	0.1885	0.28985	0.0234075		20	62	0.0535484	0.026974	0.011
	21	62	0.670919	0.515519	0.011	0.305	0.548	0.80075	1.69335	0.330121		21	62	0.185935	0.135802	0.011	0.10125	0.1455	0.21875	0.4757	0.0824728		21	62	0.0540484	0.0497553	0.011	0.011	0.0515	0.0715	0.1227	0.00772698		21	62	0.162548	0.0699092	0.08065	0.12	0.152	0.19975	0.2999	0.0324755		21	62	0.0589516	0.0364581	0.011
	22	62	0.737145	0.852194	0.13555	0.27075	0.4415	0.73175	1.98495	0.296305		22	62	0.175194	0.150592	0.011	0.0865	0.131	0.193	0.53615	0.0739366		22	62	0.0542419	0.0502286	0.011	0.011	0.049	0.08025	0.1406	0.00568223		22	62	0.158919	0.0713739	0.081	0.11225	0.142	0.19775	0.3027	0.0268514		22	62	0.0636613	0.0441346	0.011
	23	62	0.670661	1.01421	0.011	0.22325	0.3545	0.5855	1.8093	0.245878		23	62	0.148903	0.129172	0.011	0.07075	0.1125	0.17975	0.42195	0.0616368		23	62	0.0512581	0.0463239	0.011	0.011	0.047	0.07575	0.13075	0.00464346		23	62	0.141048	0.0688487	0.06015	0.0865	0.1345	0.18075	0.28305	0.0218107		23	62	0.0566935	0.0409616	0.011
	Formaldehyde											Methanol											MVK+MACR											Acetaldehyde											Acetone + Propanal + Glyoxal
	Observations									Simulation		Observations									Simulation		Observations									Simulation		Observations									Simulation		Observations
	Hour	Number of sampling	Mean	Standard deviation	5th percentile	25th percentile	Med	75th percentile	95th percentile	Modeled Concentration		Hour	Number of sampling	Mean	Standard deviation	5th percentile	25th percentile	Med	75th percentile	95th percentile	Modeled Concentration		Hour	Number of sampling	Mean	Standard deviation	5th percentile	25th percentile	Med	75th percentile	95th percentile	Modeled Concentration		Hour	Number of sampling	Mean	Standard deviation	5th percentile	25th percentile	Med	75th percentile	95th percentile	Modeled Concentration		Hour	Number of sampling	Mean	Standard deviation	5th percentile
	0	600	0.802665	0.235713	0.486477	0.607549	0.791173	0.918506	1.28898	0.190467		0	600	5.99191	2.16032	3.29322	4.17811	5.71992	7.36758	10.042	0.940603		0	600	0.110327	0.0964439	0.0303662	0.0467023	0.0764509	0.135068	0.276181	0.0923351		0	600	1.09318	0.457864	0.594367	0.704392	0.989058	1.33543	2.02671	0.259466		0	600	1.04315	0.47937	0.517766
	1	600	0.787973	0.219459	0.482798	0.595132	0.777802	0.924753	1.19171	0.176943		1	600	6.16463	2.40703	3.05818	4.25214	5.79244	8.06851	9.93123	0.941577		1	600	0.109101	0.0972709	0.0262597	0.0420707	0.0712758	0.147321	0.248455	0.0890035		1	600	1.0947	0.464608	0.56442	0.671768	1.01506	1.3643	2.03609	0.257151		1	600	1.01773	0.45403	0.502271
	2	599	0.771207	0.216575	0.476993	0.575005	0.745329	0.924474	1.18854	0.150327		2	599	6.26011	2.42723	2.95642	4.21224	5.96669	7.95839	10.5857	0.856468		2	599	0.106256	0.0987434	0.0251298	0.0386211	0.075925	0.142234	0.236461	0.0786243		2	599	1.10455	0.533293	0.555851	0.653223	0.962659	1.37669	2.31932	0.2318		2	599	1.00737	0.498168	0.470377
	3	599	0.760275	0.221287	0.484419	0.560314	0.741741	0.912867	1.1343	0.14598		3	599	6.266	2.53552	2.81249	4.34329	5.56659	8.08238	10.553	0.888199		3	599	0.107041	0.0972653	0.0241716	0.0378599	0.0672306	0.144877	0.273008	0.0796644		3	599	1.11523	0.546539	0.550178	0.680848	0.95461	1.35801	2.3729	0.238267		3	599	0.989359	0.492846	0.453312
	4	600	0.751829	0.207338	0.479296	0.570934	0.741708	0.869208	1.10785	0.145591		4	600	5.98404	2.18845	2.74652	4.27509	5.6042	7.83948	9.65271	0.937147		4	600	0.109029	0.0943812	0.0256579	0.0389295	0.0648976	0.137381	0.283463	0.0827623		4	600	1.12394	0.518558	0.562789	0.738795	0.952262	1.3838	2.2212	0.249831		4	600	0.971301	0.489888	0.450155
	5	599	0.777022	0.215026	0.489636	0.587767	0.77313	0.901387	1.18558	0.177892		5	599	6.07723	2.61394	2.84301	4.33016	5.35079	7.74569	9.9591	1.21778		5	599	0.114061	0.0954579	0.0264377	0.0445222	0.0674652	0.147395	0.296149	0.109301		5	599	1.20418	0.557979	0.604926	0.825876	1.02779	1.3537	2.45246	0.331282		5	599	0.932561	0.421	0.440405
	6	595	0.8233	0.260592	0.50226	0.599566	0.804492	0.948377	1.33381	0.245603		6	595	5.68674	2.12976	2.76677	4.12534	5.11266	7.50369	9.03629	1.79958		6	595	0.122678	0.105007	0.0296735	0.051098	0.0733519	0.158079	0.339951	0.161599		6	595	1.2664	0.645357	0.61489	0.826562	1.05426	1.45347	2.81936	0.48687		6	595	1.0024	0.603592	0.469657
	7	506	0.838442	0.249094	0.530959	0.635327	0.800806	0.972634	1.36776	0.347641		7	506	5.36613	2.16304	2.67305	3.83538	4.81386	7.09676	8.47658	2.48017		7	506	0.128725	0.0955965	0.0373182	0.0617197	0.0896842	0.174864	0.347173	0.231584		7	506	1.23692	0.601924	0.647361	0.870156	1.04852	1.38534	2.73104	0.686192		7	506	1.09172	0.898357	0.487518
	8	510	0.838615	0.183808	0.56943	0.683688	0.857784	0.967926	1.14319	0.369837		8	510	5.21994	4.30944	2.84146	3.69631	4.6087	5.7647	7.80949	2.27945		8	510	0.116432	0.0682521	0.052832	0.0657963	0.085289	0.154496	0.265288	0.233492		8	510	1.09321	0.373697	0.663322	0.829689	0.982807	1.22614	1.86577	0.650145		8	510	1.09753	1.37401	0.508086
	9	542	0.862475	0.188571	0.599512	0.714365	0.841662	0.961367	1.2152	0.377361		9	542	5.3475	3.77283	2.85074	3.65634	4.51872	5.98903	9.89918	1.80163		9	542	0.124989	0.0743391	0.0602782	0.0732029	0.0917786	0.15341	0.291057	0.214641		9	542	1.0545	0.351853	0.649977	0.820507	0.958555	1.17218	1.84669	0.525521		9	542	1.03025	1.16086	0.508001
	10	550	0.873734	0.187846	0.630401	0.729919	0.846263	0.966239	1.27036	0.426595		10	550	4.86653	1.98729	2.96545	3.5441	4.15748	5.729	8.51909	1.46385		10	550	0.122175	0.0675107	0.0623595	0.0812451	0.0957712	0.140183	0.254633	0.211884		10	550	1.01919	0.347193	0.668466	0.811399	0.934369	1.08975	1.8493	0.450895		10	550	1.03452	2.00552	0.537414
	11	550	0.88387	0.177447	0.651888	0.753567	0.85811	0.982213	1.22303	0.466888		11	550	4.81311	1.79742	2.97109	3.67223	4.22844	5.74641	7.60983	1.11234		11	550	0.114496	0.0431263	0.0682297	0.0836584	0.102092	0.126419	0.205518	0.200915		11	550	0.930835	0.191126	0.651215	0.801732	0.909319	1.02937	1.30374	0.368551		11	550	0.922702	0.921732	0.538399
	12	549	0.901124	0.183626	0.668217	0.767611	0.867013	1.00858	1.25004	0.484377		12	549	4.8785	1.70903	3.12228	3.82199	4.32301	5.7983	7.73763	0.872688		12	549	0.117526	0.0474685	0.0653138	0.0858049	0.103658	0.13611	0.218571	0.179342		12	549	0.918544	0.185795	0.66436	0.790494	0.890723	1.01464	1.27462	0.303306		12	549	1.4174	2.92072	0.55054
	13	509	0.910428	0.165018	0.663484	0.791623	0.88777	1.02915	1.16838	0.542814		13	509	5.08445	1.82738	3.21532	3.92786	4.59575	5.85038	8.03748	0.819262		13	509	0.125077	0.0473426	0.0688189	0.0907954	0.112586	0.152089	0.206617	0.175272		13	509	0.919164	0.189416	0.629813	0.777989	0.916578	1.02139	1.25539	0.294505		13	509	1.23736	1.41537	0.584451
	14	550	0.920729	0.181084	0.667421	0.773542	0.88884	1.05785	1.25226	0.542062		14	550	5.04054	1.73375	3.33274	3.89281	4.51531	6.00644	7.75712	0.764398		14	550	0.133634	0.0506453	0.0765022	0.0951435	0.119152	0.160286	0.237935	0.161368		14	550	0.918325	0.179868	0.659129	0.78468	0.902087	1.02981	1.25448	0.276563		14	550	1.11058	1.47637	0.571352
	15	565	0.91779	0.179678	0.677321	0.778286	0.895115	1.04193	1.22019	0.569972		15	565	5.01604	1.54646	3.30833	3.89405	4.58121	5.99324	7.72529	0.798114		15	565	0.140261	0.052481	0.0800138	0.102374	0.126917	0.167579	0.253496	0.170506		15	565	0.935384	0.184986	0.655666	0.779864	0.936509	1.0619	1.24625	0.285386		15	565	1.00477	1.09106	0.591809
	16	571	0.931988	0.199003	0.654729	0.779874	0.908257	1.05418	1.3259	0.536181		16	571	4.85761	1.34768	3.26446	3.84258	4.5424	5.74086	7.2769	0.908488		16	571	0.143719	0.061211	0.0799441	0.0976619	0.125381	0.174225	0.275786	0.176008		16	571	0.977649	0.220561	0.651791	0.79789	0.975702	1.12294	1.37913	0.312318		16	571	0.895634	0.279936	0.601001
	17	578	0.920673	0.197755	0.647288	0.782459	0.898598	1.0312	1.30835	0.493092		17	578	4.98262	1.50255	3.45843	3.94908	4.60269	5.72688	7.66574	1.01352		17	578	0.15242	0.0774482	0.0719479	0.0933263	0.134158	0.18148	0.297376	0.178383		17	578	1.00747	0.463006	0.676179	0.794248	0.918872	1.11896	1.48143	0.33529		17	578	0.908958	0.329996	0.606756
	18	597	0.905338	0.197554	0.600404	0.766036	0.895313	1.03714	1.26536	0.427324		18	597	5.2022	1.58056	3.44843	4.05227	4.85357	5.80038	8.60468	1.06547		18	597	0.151757	0.0951754	0.0681313	0.0886583	0.134521	0.174517	0.424172	0.168523		18	597	1.10634	0.603793	0.68806	0.817393	0.952336	1.10672	2.0146	0.338134		18	597	0.915509	0.344952	0.584908
	19	600	0.907813	0.211543	0.549085	0.772079	0.914159	1.04174	1.27892	0.349517		19	600	5.47808	1.8499	3.58905	4.25863	4.97987	6.08458	9.74778	0.946749		19	600	0.157056	0.110927	0.0621026	0.0815523	0.136176	0.181936	0.442362	0.14241		19	600	1.16385	0.486857	0.732105	0.869796	1.01121	1.25062	2.37375	0.296294		19	600	0.969117	0.361205	0.62046
	20	597	0.885852	0.215504	0.538042	0.730528	0.879773	1.04174	1.26148	0.3077		20	597	5.59704	1.74485	3.59423	4.34118	5.16802	6.4305	9.62728	0.96231		20	597	0.150749	0.11081	0.053671	0.0777841	0.117708	0.169575	0.392044	0.131554		20	597	1.17776	0.475688	0.738574	0.860057	1.05722	1.31821	2.21803	0.293663		20	597	0.981726	0.327397	0.627921
	21	600	0.857291	0.212735	0.529723	0.698756	0.840585	1.02218	1.20098	0.306794		21	600	5.668	1.75581	3.66371	4.2083	5.09721	6.85741	9.13548	1.2358		21	600	0.134999	0.0963326	0.051581	0.0670393	0.101041	0.159602	0.345963	0.143915		21	600	1.15071	0.386905	0.69736	0.840117	1.03566	1.4728	1.89444	0.359426		21	600	0.999862	0.354285	0.636942
	22	595	0.830373	0.211772	0.515308	0.644526	0.825873	0.992726	1.18431	0.267423		22	595	5.66504	1.8771	3.51397	4.18681	5.01816	6.95996	9.24437	1.14246		22	595	0.120726	0.093927	0.041814	0.0549216	0.0933127	0.147493	0.304112	0.123323		22	595	1.09102	0.376447	0.634338	0.775034	1.01076	1.35891	1.81124	0.32121		22	595	0.956566	0.31892	0.596057
	23	599	0.816709	0.219181	0.500618	0.638968	0.818346	0.945971	1.23276	0.208274		23	599	5.73383	2.00832	3.46536	4.07185	5.23781	7.06187	9.48255	0.942153		23	599	0.110128	0.0927699	0.0362099	0.0487733	0.0770659	0.13496	0.280044	0.097133		23	599	1.07263	0.405686	0.613675	0.729719	0.958362	1.27965	1.88183	0.263188		23	599	0.959389	0.35349	0.535748
[truncated: 75 more columns]
