# Supplementary figures and images for: Investigating the role of anthropogenic terpenoids in urban secondary pollution under summer conditions by a box modeling approach
Source: Royal Society of Chemistry journal article supplement (doi:10.1039/d4ea00112e), 2025-01-01

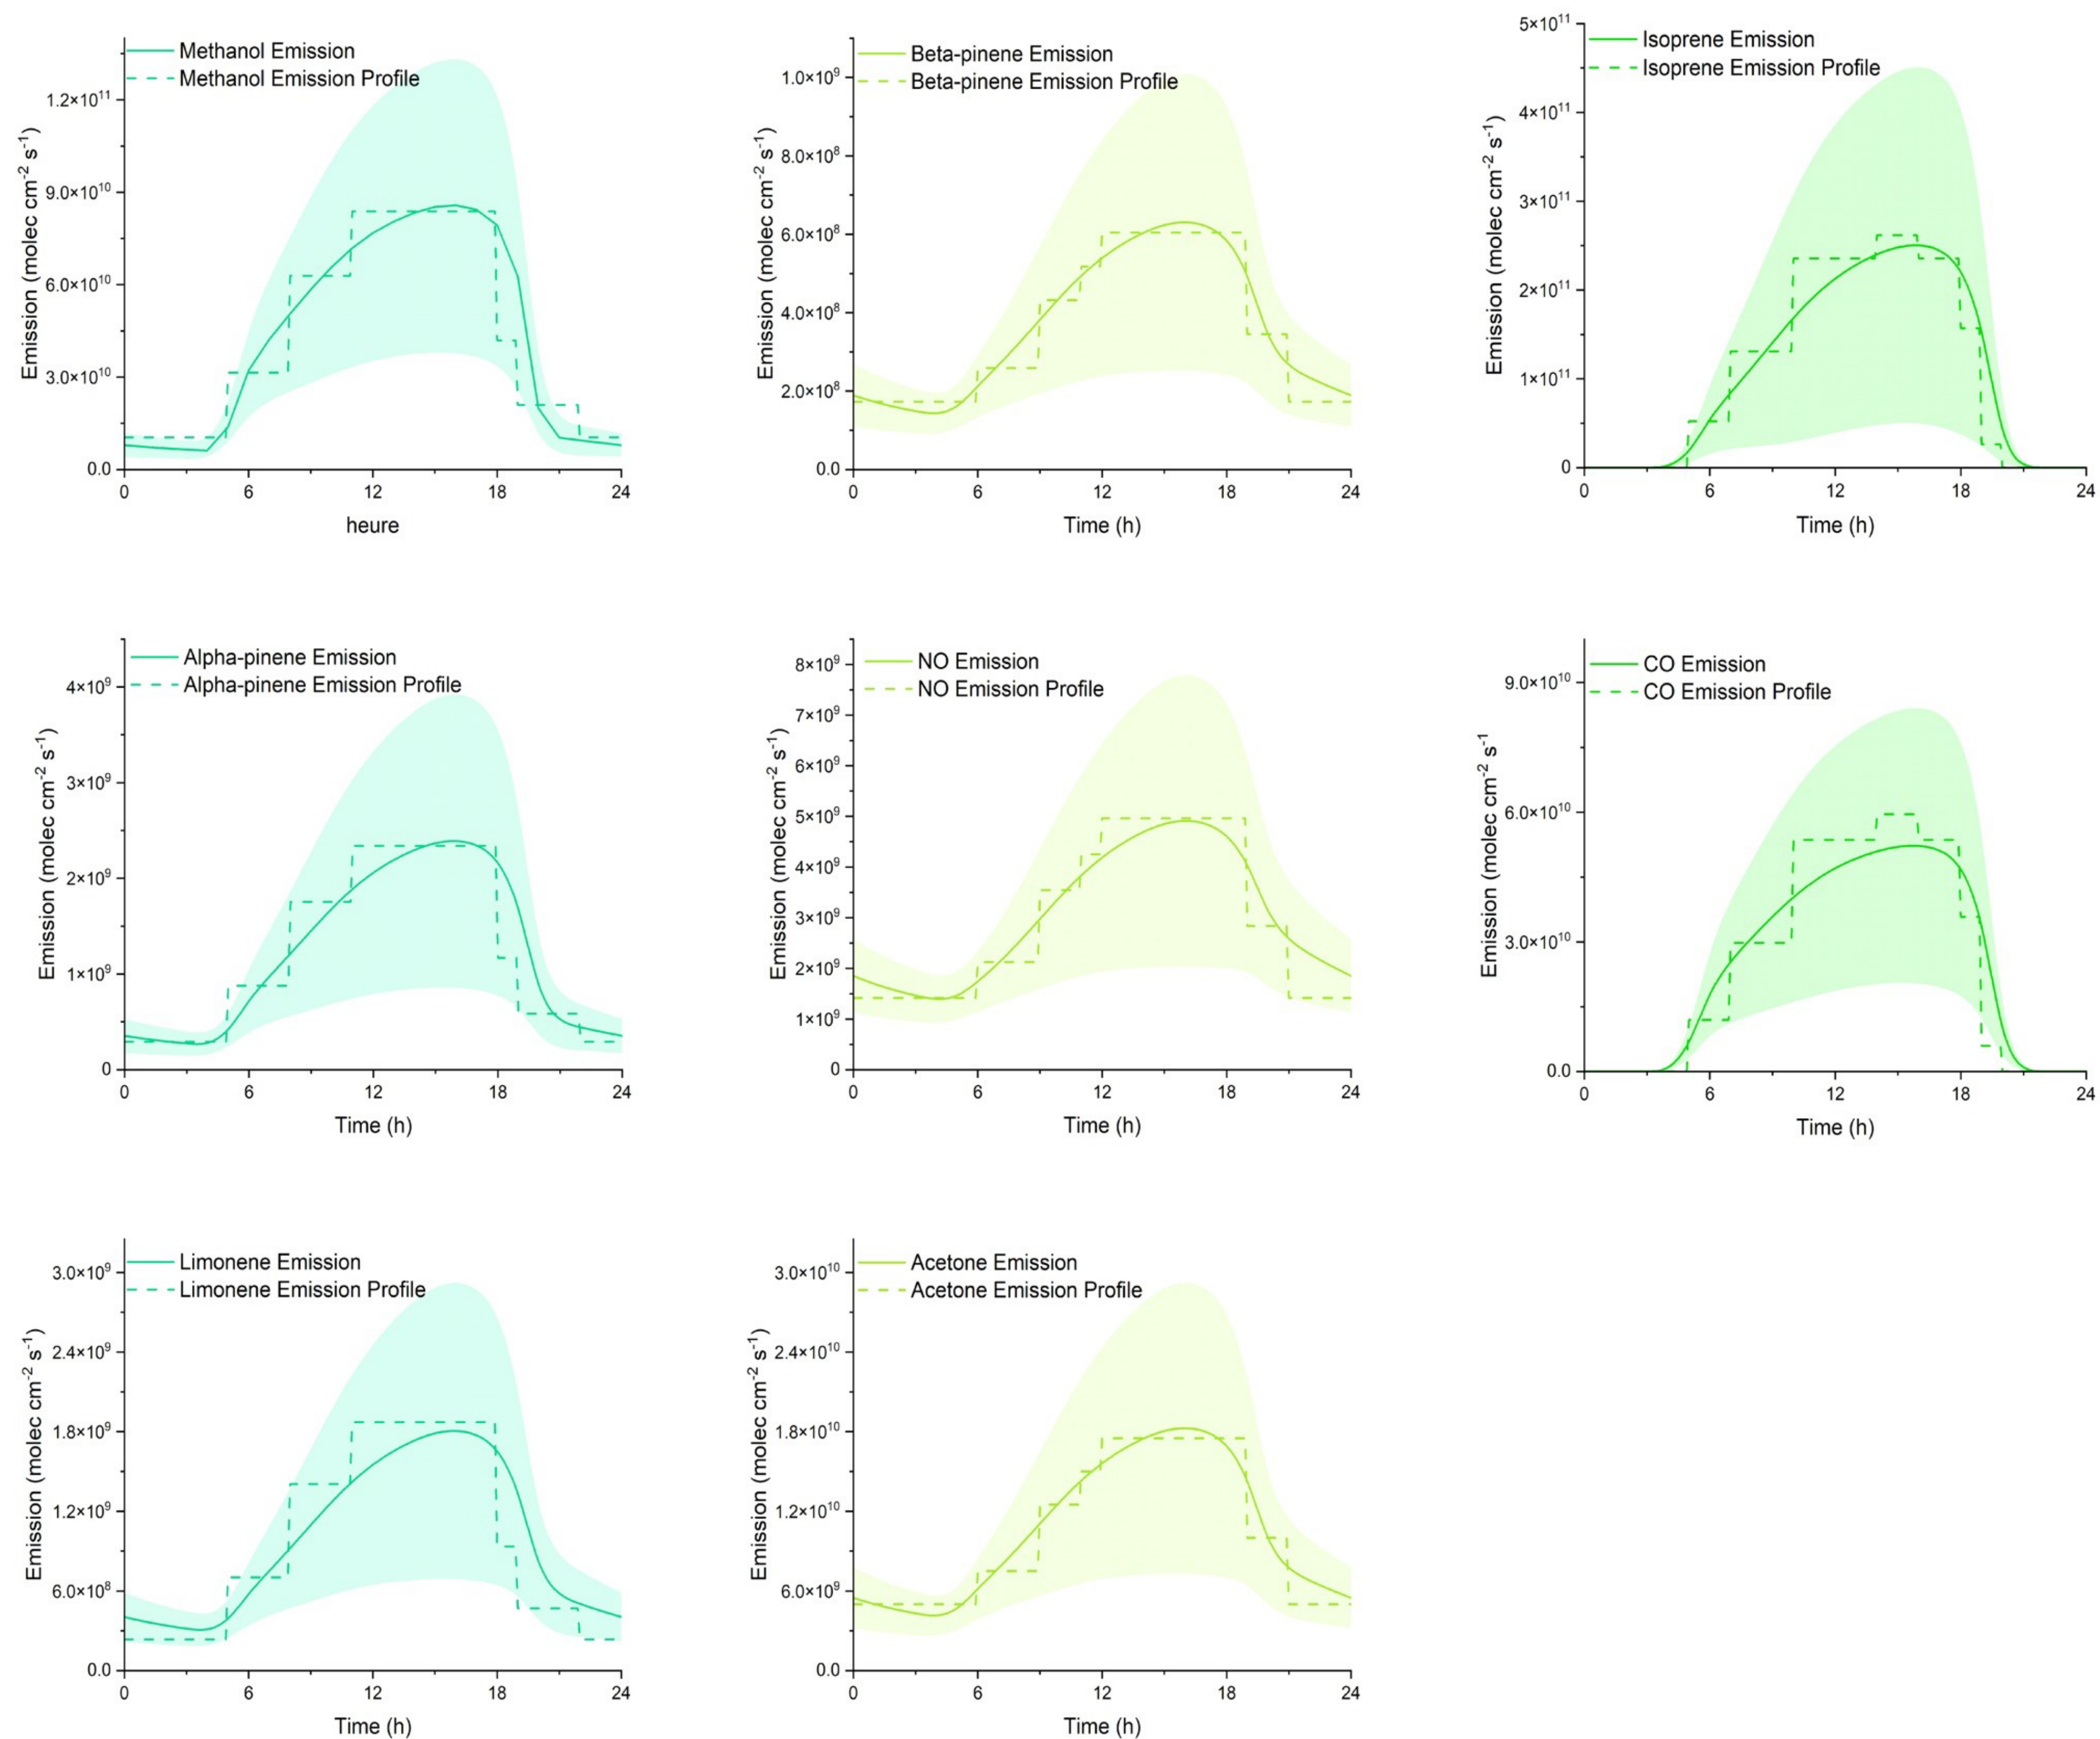

Supplement: d4ea00112e6.pdf [file d4ea00112e6.pdf]
